# Supplementary material for: Effect of Social Media on The Academic Performance of Students in College of Nursing Sciences Gombe, North-East Nigeria: A Cross-Sectional Study
Source: Research Square preprint supplement (doi:10.21203/rs.3.rs-6058474/v1), 2025-04-04
Supplement: Supplementary file 1 [file 23e40f2b8efd4618bd72162b.docx]

**SOCIAL MEDIA AND ACADEMIC PERFORMANCE OF STUDENTS QUESTIONNAIRE (SMAAPOS)**

Dear respondents,

The main purpose of the study is to determine the Influence of Social Media on Academic Performances on students of College of Nursing and Midwifery, Gombe,


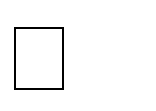
Please read carefully and tick ( ) the appropriate column for each statement as promptly as possible. All information gathered shall be used purely for research purpose and shall be treated with confidentiality.

Thanks,

# SECTION A (DEMOGRAPHIC DATA)

**Sex:** Male [ ] Female [ ]

**Age:** 16 – 20[ ] 21 – 25[ ] 26 and Above[ ]

| **Level:** | 100[ ] | 200[ ] | 300[ ] |
| --- | --- | --- | --- |
|  | Post Basic [ | ] |  |

# SECTION B

**SA- Strongly Agree, A- Agree, D- Disagree, SD- Strongly Disagree**

| **S/N** | **ITEMS** | **SA** | **A** | **D** | **SD** |
| --- | --- | --- | --- | --- | --- |
|  | **STUDENTS ADDICTIVENESS TO SOCIAL NETWORK AND** |  |  |  |  |
| **ACADEMIC PERFORMANCE** |
| 1 | Addiction to online social networks is a problematic issue that affects |  |  |  |  |
| my academic life. |
| 2 | Online social networks distract me from my studies. |  |  |  |  |
| 3 | Hours spent online can never be compared to the number of hours I |  |  |  |  |
| spent reading. |
| 4 | There is no improvement in my grades since I became engaged into these |  |  |  |  |
| social networking sites. |
|  | **EXPOSURE OF STUDENTS TO SOCIAL MEDIA NETWORK** |  |  |  |  |
| **AND THEIR ACADEMIC PERFORMANCE** |
| 5 | I usually have unlimited access to Facebook and this has affected my |  |  |  |  |
| academic performance negatively. |
| 6 | I engage in academic discussions on twitter and this has improved my |  |  |  |  |
| academic performance. |
| 7 | I make use of whatsapp to disseminate knowledge to my class mate. |  |  |  |  |
| 8 | I Solely rely on information gotten from Wikipedia to do my |  |  |  |  |
| assignments without consulting other sources. |
|  | **USE OF SOCIAL MEDIA AND STUDENTS’ ACADEMIC** |  |  |  |  |

|  | **PERFORMANCE** |  |  |  |  |
| --- | --- | --- | --- | --- | --- |
| 9 | The usage of Wikipedia for research has helped improve my grades. |  |  |  |  |
| 10 | Engaging in academic forums on yahoo reduces my rate of |  |  |  |  |
| understanding. |
| 11 | I use materials gotten from blogging sites to complement what I have |  |  |  |  |
| been taught in class. |
| 12 | I will not perform well in my academics even if I stop using social media. |  |  |  |  |
